# Supplementary material for: Game—Gimme a Better Price! A Negotiation Role Play on B2B Pricing in Hotel Revenue Management
Source: Atypon-hosted journal article supplement (doi:10.1287/ited.2021.0268), 2022-02-02
Supplement: ited.2021.0268.sm1.xlsx [file ited.2021.0268.sm1.xlsx]

## Sheet: 1) Cover page
Gimme a Better Price! A Negotiation Role Play on B2B Pricing in Hotel Revenue Management
Authors:

## Sheet: 2) Instructor matrix
FOR INSTRUCTOR USE
			Materials required	Student deliverables	Evaluation	Timing	Other
	Before the session
		Pre-assignment hand-in		Brief market study (individual)	Pass/fail evaluation w an individual bonus for approximately top 10 students
	Role play
		Introduction	Introductory presentation to emphasize value-based pricing as the focus of the exercise				Tell students to monitor their emails during the day in case of additional information. Even if not used, this gives an option to redirect the play if need be in case the location allows students to spread
		Strategy preparation	Hand out strategy preparation guidelines. Two versions of key client instructions to create different segments (A&B; hand out according to coding)	5-minute presentation of the strategy as per guidelines, to be presented in the afternoon	Presentation preparation	Emphasize the need to prepare the presentation during this time	Students may, but don’t have to, use PowerPoint or similar
		Negotiation strategy preparation	A handout with a list of stakeholders the group should meet, and the goals for the negotiations	Strategy for negotiations	Presentation preparation
		Negotiations		Short minutes of each meeting	Email one file at the end of the session per group	The groups may not have the time to meet everyone they intend to, or everyone may not wish to meet them. More meetings may also take place	Leave room for discovery; "there are a few ground rules". What about canceling a contract, for example? Non-price discounts?
		Lunch				Students may continue preparing the presentations during lunch
		Negotiation reflection	Back in original groups, students reflect on their success during the meetings	Presentation for the afternoon of key reflections	Presentation preparation		See separate reflection guidelines given to students
		Sharing of learning	According to separate questions	Reflection on learning during the game
		Role reflection	Regroup students per role, not stakeholder. List of questions to reflect on in those groups. Group discussion (6 large groups/ 10mins each)	Discussion; debate between stakeholders from different groups		Simultaneous discussions where instructors listen in.	This time could also act as a buffer; if the reflections during the presentations are interesting and many questions are spurred, this part could be left out
		Concluding remarks
		Submit narrated presentation by end of day			Evaluation

## Sheet: 3) Timetable
				Property 1	Property 2	Property 3	Property 4	Chain 1	Property 5	Property 6	Property 7	Property 8	Chain 2	Key Client 1	Key Client 2	Key Client 3	Key Client 4
		Date		Stakeholder groups
				1. Accor Hotels					2. Louvre Hotel Group					3. Key Clients
	Time	Session	Location	ibis budget Lyon La Part Dieu	Ibis Lyon Centre Perrache	Ibis Styles Lyon Bron Eurexpo	Mercure Lyon Centre Chateau Perrache	Accor Hotels (Head Office)	Premiere Classe Lyon Centre Gare Part Dieu	Kyriad Lyon Bron Eurexpo Le Cottage	Campanile Lyon Centre Gare Part Dieu	Golden Tulip Lyon Millenaire	Louvre Hotels Group (Head Office)	EuroNews	Renault Trucks	Biomerieux	Sanofi-Pasteur	Deliverable	Type	Outcomes	Count
	15 min	Introduction		The role play and its organization; hand out the folders														Hand-in pre-game assessment by Monday 20:00	Individual	Pass/ Fail. 10 best hand-ins receive 0.5 point bonus for assessment grade	Pass/ Fail + bonus
	60 min	Strategy preparation		Hand out instructions for the strategy session. Work in groups.														Presentation of topics as per the detailed instructions	Group	Prepare final presentation
	75 min	Hand-out negotiation goals		Prepare a strategy for the meetings based on your previous work and the additional goals handed out.														Pricing strategy agreed		Prepare final presentation
	90 min	Start negotiations		Meetings according to instructions: Each property with head office, and each property with key clients.														Strategy agreed with HO / contracts with clients		Short minutes of each meeting emailed at the end of the meeting
	60 min	Reflection on negotiations		Reflect on the meetings vs. your strategy and goals; prepare to present the reflection														Presentation of reflections
	60 min	Key reflection sharing + closing		Share key learnings of the day																Prepare final presentation
	OPTIONAL EXTRA REFLECTION IF TIME			Reflection in five functional groups (Head offices; revenue managers; general managers; S&M managers; 4 groups of KCs with one student per client in each group)														Reflection in mixed groups	Stakeholder roles
		End of day		Send narrated final presentation																Evaluation of the role play

## Sheet: 4) Pre-assignment
	Role play pre-assignment: Lyon market research
	You are about to start in a new role in the hotel industry in Lyon. To prepare for your new job in the best possible way, you want to research the market you are about to enter.
	Prepare for the role by first reading relevant literature that introduces you to value-based pricing and its introduction in hotels: Van der Rest, J.I,, Roper, A., & Wang, X.L. (2018). Why is a change of company pricing policy so hard to implement? International Journal of Hospitality Management, 69, 30-40.
	On the Teams folder you will find an STR register of Lyon properties, their sizes and classes as defined by STR, as well as trend reports of the Lyon market for economy and midscale properties and a pipeline report of future supply in the city. Use any additional resources, such as Lyon chamber of commerce, hotel websites, OTAs etc. to find additional information on the market and analyze it (for…
	Deliverable as the pre-assignment: One-page analysis about the Lyon hotel market. It must highlight 3 aspects of the market you find most noteworthy or important from a hotel perspective. Each aspect must be supported with a paragraph of text that justifies why you highlighted the aspect in question, including in-text references to indicate facts. Provide a reference list at the end.
	For example, if you feel that one of the important aspects of the market is its seasonality, support the seasonality pattern with STR data or other sources that describe how demand in Lyon fluctuates between seasons, what those seasons are, and what likely causes these fluctuations.
	Deadline, submission and grading:
	Deadline:
	Email a Word or PDF file to:
	Assignment grading: This is a pass/fail -assignment (in other words, you have to submit to pass, but there wont be a separate grade). The authors of the ten best reports will receive an individual 0.5 point bonus added to their final role play grades.

## Sheet: 5) Data
								Points database
Player	Code	Full name	Location	STR class	Opening date	Rooms
Property 1	C	ibis budget Lyon La Part Dieu	Lyon	Economy Class	2011-11-01	108		Negotiation topic	property	HO		Rate	Property C	Property D	KC(A)	KC(B)			HO-property ADR negotiation
Property 2	C	Ibis Lyon Centre Perrache	Lyon	Midscale Class	N/A	123		Improvements identified by property	3	1		-0.1	-150	-200	350	200			average rate change	property perspective	HO perspective
Property 3	D	Ibis Styles Lyon Bron Eurexpo	Bron	Midscale Class	2018-05-01	80		Improvements identified by head office	1	3		-0.05	50	100	150	100			+5%	-200	400
Property 4	D	Mercure Lyon Centre Chateau Perrache	Lyon	Upper Midscale Class	N/A	120						+5%	200	350	-250	50			0	50	50
Chain 1	HO1	Accor Hotels (Head Office)										No deal	0	0	0	0			-0.05	250	-200
Property 5	C	Premiere Classe Lyon Centre Gare Part Dieu	Lyon	Economy Class	2004-06-01	148													No deal	-500	-500
Property 6	C	Kyriad Lyon Bron Eurexpo Le Cottage	Lyon	Midscale Class	N/A	50		Investment division (for property)				volume
Property 7	D	Campanile Lyon Centre Gare Part Dieu	Lyon	Midscale Class	N/A	172		40% property/60% HO	250			250	350	250	250	400
Property 8	D	Golden Tulip Lyon Millenaire	St Priest	Upper Midscale Class	2011-08-01	131		60% property/40% HO	50			150	250	150	200	250
Chain 2	HO2	Louvre Hotels Group (Head Office)						No deal	-500			50	50	100	150	50
Key client 1	A	EuroNews						Investment division (for head office)				No deal	0	0	0	0
Key client 2	A	Renault Trucks						40% HO/60% property	200
Key client 3	B	Biomerieux						60% HO/40% property	0
Key client 4	B	Sanofi-Pasteur						No deal	-500
								Student
	Players		Total			Player no	Role	Last name	First name
1	Chain 1	Accor Hotels (Head Office)	3			1	Accor Hotels (Head Office), Senior Vice President of Pricing & Revenue Management	LN1	FN1
2	Chain 2	Louvre Hotels Group (Head Office)	3			2	Accor Hotels (Head Office), Vice President of Marketing & Sales	LN2	FN2
3	Key client 1	EuroNews	4			3	Accor Hotels (Head Office), Vice President of Business Development	LN3	FN3
4	Key client 2	Renault Trucks	4			4	Louvre Hotels Group (Head Office), Senior Vice President of Pricing & Revenue Management	LN4	FN4
5	Key client 3	Biomerieux	4			5	Louvre Hotels Group (Head Office), Vice President of Marketing & Sales	LN5	FN5
6	Key client 4	Sanofi-Pasteur	4			6	Louvre Hotels Group (Head Office), Vice President of Business Development	LN6	FN6
7	Property 1	ibis budget Lyon La Part Dieu	3			7	EuroNews, Corporate Travel Manager	LN7	FN7
8	Property 2	Ibis Lyon Centre Perrache	3			8	EuroNews, Corporate Travel Coordinator	LN8	FN8
9	Property 3	Ibis Styles Lyon Bron Eurexpo	3			9	EuroNews, Corporate Travel Coordinator	LN9	FN9
10	Property 4	Mercure Lyon Centre Chateau Perrache	3			10	EuroNews, Corporate Travel Coordinator	LN10	FN10
11	Property 5	Premiere Classe Lyon Centre Gare Part Dieu	3			11	Renault Trucks, Corporate Travel Manager	LN11	FN11
12	Property 6	Kyriad Lyon Bron Eurexpo Le Cottage	3			12	Renault Trucks, Corporate Travel Coordinator	LN12	FN12
13	Property 7	Campanile Lyon Centre Gare Part Dieu	3			13	Renault Trucks, Corporate Travel Coordinator	LN13	FN13
14	Property 8	Golden Tulip Lyon Millenaire	3			14	Renault Trucks, Corporate Travel Coordinator	LN14	FN14
			46			15	Biomerieux, Corporate Travel Manager	LN15	FN15
						16	Biomerieux, Corporate Travel Coordinator	LN16	FN16
	Titles					17	Biomerieux, Corporate Travel Coordinator	LN17	FN17
1	Senior Vice President of Pricing & Revenue Management					18	Biomerieux, Corporate Travel Coordinator	LN18	FN18
2	Vice President of Marketing & Sales					19	Sanofi-Pasteur, Corporate Travel Manager	LN19	FN19
3	Vice President of Business Development					20	Sanofi-Pasteur, Corporate Travel Coordinator	LN20	FN20
4	Corporate Travel Manager					21	Sanofi-Pasteur, Corporate Travel Coordinator	LN21	FN21
5	Corporate Travel Coordinator					22	Sanofi-Pasteur, Corporate Travel Coordinator	LN22	FN22
6	Corporate Travel Coordinator					23	ibis budget Lyon La Part Dieu, General Manager	LN23	FN23
7	Corporate Travel Coordinator					24	ibis budget Lyon La Part Dieu, Revenue Manager	LN24	FN24
8	General Manager					25	ibis budget Lyon La Part Dieu, Sales and Marketing Manager	LN25	FN25
9	Revenue Manager					26	Ibis Lyon Centre Perrache, General Manager	LN26	FN26
10	Sales and Marketing Manager					27	Ibis Lyon Centre Perrache, Revenue Manager	LN27	FN27
						28	Ibis Lyon Centre Perrache, Sales and Marketing Manager	LN28	FN28
						29	Ibis Styles Lyon Bron Eurexpo, General Manager	LN29	FN29
CEO Chain 1	Sébastien Bazin, CEO, Accor Hotels					30	Ibis Styles Lyon Bron Eurexpo, Revenue Manager	LN30	FN30
CEO Chain 2	Pierre-Frédéric Roulot, CEO, Louvre Hotels Group					31	Ibis Styles Lyon Bron Eurexpo, Sales and Marketing Manager	LN31	FN31
						32	Mercure Lyon Centre Chateau Perrache, General Manager	LN32	FN32
Dates	Memo1	2021-02-05				33	Mercure Lyon Centre Chateau Perrache, Revenue Manager	LN33	FN33
	Memo2	2021-02-12				34	Mercure Lyon Centre Chateau Perrache, Sales and Marketing Manager	LN34	FN34
	Memo3	2021-02-18				35	Premiere Classe Lyon Centre Gare Part Dieu, General Manager	LN35	FN35
	Memo4	2021-02-22				36	Premiere Classe Lyon Centre Gare Part Dieu, Revenue Manager	LN36	FN36
	Memo5	2021-02-23				37	Premiere Classe Lyon Centre Gare Part Dieu, Sales and Marketing Manager	LN37	FN37
	Memo6	2021-03-02	the day before the play			38	Kyriad Lyon Bron Eurexpo Le Cottage, General Manager	LN38	FN38
	CEOMemo	2021-03-01				39	Kyriad Lyon Bron Eurexpo Le Cottage, Revenue Manager	LN39	FN39
	KCMemo	2021-02-28				40	Kyriad Lyon Bron Eurexpo Le Cottage, Sales and Marketing Manager	LN40	FN40
						41	Campanile Lyon Centre Gare Part Dieu, General Manager	LN41	FN41
						42	Campanile Lyon Centre Gare Part Dieu, Revenue Manager	LN42	FN42
						43	Campanile Lyon Centre Gare Part Dieu, Sales and Marketing Manager	LN43	FN43
						44	Golden Tulip Lyon Millenaire, General Manager	LN44	FN44
						45	Golden Tulip Lyon Millenaire, Revenue Manager	LN45	FN45
						46	Golden Tulip Lyon Millenaire, Sales and Marketing Manager	LN46	FN46

## Sheet: 6) Strategy preparation
Chain 1	Chain 2
Deliverable: a presentation on the topics as described during the introduction.	Deliverable: a presentation on the topics as described during the introduction.	Deliverable: a presentation on the topics as described during the introduction.	Deliverable: a presentation on the topics as described during the introduction.	Deliverable: a presentation on the topics as described during the introduction.
The purpose of this session is to prepare a general strategy that will guide your tactics in the next phase.	The purpose of this session is to prepare a general strategy that will guide your tactics in the next phase.	The purpose of this session is to prepare a general strategy that will guide your tactics in the next phase.	The purpose of this session is to prepare a general strategy that will guide your tactics in the next phase.	The purpose of this session is to prepare a general strategy that will guide your tactics in the next phase.
Accor Hotels (Head Office)	Louvre Hotels Group (Head Office)	Hotel management team member (GM, RM, SM)	Corporate Travel team (A)	Corporate Travel team (B)
You have identified the following properties as lagging behind the rest in your chain:	You have identified the following properties as lagging behind the rest in your chain:	As a management team, your task is to (1) define your compset and customer segments, (2) identify key investments that must be made in your hotel to create more value for your customers given the competitors' offerings along with their approximate costs, and (3) evaluate current rate differences between the compset and your property and suggest overall adjustment (increase/ decrease) to your rate…	You represent a company that wishes to accommodate its staff that has travelled to the head office from other branches in economy or cheap midscale hotels. Clean rooms, possibility for breakfast, and a gym/ sports facility for the guests are your main expectations; anything else is bonus. Thus price is the main driver, and you are interested in the lower-end of hotels in terms of pricing. You are…	You represent a company that wishes to accommodate business client travelers from other locations. While budget is a concern, the hotels should be midscale, though preferably in upper midscale. The guests must enjoy their visits, though upscale is certainly not expected. Price matters, but for good customer value provided you are willing to pay a premium.
ibis budget Lyon La Part Dieu	Premiere Classe Lyon Centre Gare Part Dieu	The focus areas of each team member include:			Property 1	Property 5
Ibis Lyon Centre Perrache	Kyriad Lyon Bron Eurexpo Le Cottage				Property 2	Property 6
Ibis Styles Lyon Bron Eurexpo	Campanile Lyon Centre Gare Part Dieu	General Manager			Property 3	Property 7
Mercure Lyon Centre Chateau Perrache	Golden Tulip Lyon Millenaire	The GM and the RM work together on defining the compset. The GM carries the final responsibility over pricing decisions and formulation of the pricing strategy after consulting with the team. The GM is there to ensure the profitability of the property. It would be relatively simple for a property to cover operational costs in the short term, but ensuring sustainable profits in the long run is a c…	You may analyze any hotels in the market that match the category you are interested in, but you should focus particularly on the ones as indicated below, as you will later have an opportunity to negotiate rates with them. Obviously, any information from other properties can be used to support your value-based pricing argumentation. Customer comments from sources such as TripAdvisor will serve as …	You may analyze any hotels in the market that match the category you are interested in, but you should focus particularly on the ones that are part of the game, as you will later have an opportunity to negotiate rates with them. Obviously, any information from other properties can be used to support your value-based pricing argumentation. Customer comments from sources such as TripAdvisor will al…	Property 4	Property 8
Focus on the current market situation and compare the properties in your chain with key competitors in each segment. Use a value-price matrix to evaluate whether your hotels are optimally placed against competition, and identify changes you would like to create in terms of hotel price levels and the value they offer to customers. Get prepared to argue for (1) investments along with their costs th…	Focus on the current market situation and compare the properties in your chain with key competitors in each segment. Use a value-price matrix to evaluate whether your hotels are optimally placed against competition, and identify changes you would like to create in terms of hotel price levels and the value they offer to customers. Get prepared to argue for (1) investments along with their costs th…	The GM has the overview of the hotel. While all team members need to contribute to this, the GM should keep the relationship between the value the hotel can offer now (and with potential future investments), and any rate changes, clearly in mind. Higher rates have to be justified with more value to the customer.	You may not have time to meet with all 8 properties, and you may choose which to meet. The properties do not know any of this, and you may decline their meeting requests. You may also be negotiating with one to put pressure on another one (which you consider your main interest). However, you do need to meet your own room contracting targets (given to you later).	You may not have time to meet with all 8 properties, and you may choose which to meet. The properties do not know any of this, and you may decline their meeting requests. You may also be negotiating with one to put pressure on another one (which you consider your main interest). However, you do need to meet your own room contracting targets (given to you later).
		Revenue Manager
In value-based pricing, the focus is on the value a hotel can offer to the customer. Higher value allows higher rate, and vice versa. Your task is to plan the right attributes of value for each type of property in your chain so that you can attract customers in each segment. In your strategy presentation, present examples of attributes (for each property) you believe that clients value, both exis…	In value-based pricing, the focus is on the value a hotel can offer to the customer. Higher value allows higher rate, and vice versa. Your task is to plan the right attributes of value for each type of property in your chain so that you can attract customers in each segment. In your strategy presentation, present examples of attributes (for each property) you believe that clients value, both exis…	The RM, in addition to working on the compset, focuses primarily on justifying the value the property can provide in return for the rates. His/her role includes evaluation of rates between the compset and the property, and suggestions to GM on how to proceed. The balance between occupancy and ADR is a key consideration for the RM. He/she also is the expert on the details of the Lyon market in ter…	In your presentation, show examples of attributes that bring you value, and include potential additional attributes (services and facilities) that would bring you extra value. Focus on the hotels that interest you most as a client.	In your presentation, show examples of attributes that bring you value, and include potential additional attributes (services and facilities) that would bring you extra value. Focus on the hotels that interest you most as a client.
Memo from CEO, dated Mar-01	Memo from CEO, dated Mar-01	Sales and Marketing Manager
The Lyon market lacks in performance compared to other significant French cities (Paris, Marseille, Lille, Bordeaux). Out of this group, your area is the weakest in terms of both occupancy and ADR. You must revise your offering as a group based on principles of customer value, and bring the performance up to par with the rest of the cities. I expect a plan with a buy-in from the properties by Mar…	The Lyon market lacks in performance compared to other significant French cities (Paris, Marseille, Lille, Bordeaux). Out of this group, your area is the weakest in terms of both occupancy and ADR. You must revise your offering as a group based on principles of customer value, and bring the performance up to par with the rest of the cities. I expect a plan with a buy-in from the properties by Mar…	The SM manager focuses on the clients. His/her primary task is to understand customer behavior and preferences, and know what they are willing to pay. SM manager is in contact with the key clients and works toward securing contract for the hotel. Furthermore, the definition of customer segments for the property relies on the SM.
Sébastien Bazin, CEO, Accor Hotels	Pierre-Frédéric Roulot, CEO, Louvre Hotels Group
		In your presentation, show examples of attributes of your hotel you believe your customers value, and new attributes (services or facilities) you believe they would appreciate. A key challenge of value based pricing is how to communicate the value to the customer to justify the rate.
		Memo from front office manager, Feb-05
		Getting complaints from clients about poor perceived value. Many of them ask for discounts and talk about choosing competitors. More worryingly, they give quite valid examples of how competition offers better value in terms of room quality, breakfast, and amenities. I thought I'd let you know.	Properties you have the opportunity to meet:	Properties you have the opportunity to meet:
		Memo from sales & marketing manager, Feb-12	ibis budget Lyon La Part Dieu	ibis budget Lyon La Part Dieu
		We are staring to lose market share. With the current rates we cannot maintain occupancy. We must lower rates!	Ibis Lyon Centre Perrache	Ibis Lyon Centre Perrache
		Memo from revenue manager, Feb-18	Ibis Styles Lyon Bron Eurexpo	Ibis Styles Lyon Bron Eurexpo
		Lowering rates would lead to a price war. Our competition will be able to last longer than us in that case. No to lowering rates. Let's develop a campaign and add free breakfast to room rate when booked through our site, while maintaining current rate structure. You have some leeway in negotiating with TOP 10 clients.	Mercure Lyon Centre Chateau Perrache	Mercure Lyon Centre Chateau Perrache
		Memo from finance manager, Feb-22	Premiere Classe Lyon Centre Gare Part Dieu	Premiere Classe Lyon Centre Gare Part Dieu
		Dear all, if we maintain the current rate structure and occupancy levels, we will not reach our EBITDA targets. We must do something!	Kyriad Lyon Bron Eurexpo Le Cottage	Kyriad Lyon Bron Eurexpo Le Cottage
		Memo from general manager , Feb-23	Campanile Lyon Centre Gare Part Dieu	Campanile Lyon Centre Gare Part Dieu
		We must pick up the slack. Meet today at 2pm to discuss options. Unless we figure out something, our November performance will be a red flag.	Golden Tulip Lyon Millenaire	Golden Tulip Lyon Millenaire
		Memo from general manager, Mar-02	Memo from your manager, dated Feb-28	Memo from your manager, dated Feb-28
		I just received a message from HO. We haven't done enough, and our troubles have been noticed at the HO. They will be here tomorrow to discuss pricing strategy. We must come up with investments that increase the value customers perceive in our hotel. Meet you at 10am.	We spend too much in accommodation currently. See what you can do. Obviously, we do want to maintain basic quality, but we cant keep paying as much as we do right now.	Our visitors have expressed doubts about the current hotels we use. Their concerns seem legitimate. See if you can either negotiate better rooms with them for the old prices, or find new properties that offer better value. We can't start paying a lot more than earlier, but the current situation is unsustainable. If we travel to our other offices, we do get better rooms...

## Sheet: 7) Negotiation goals per role
	NEGOTIATION INSTRUCTIONS FOR HEAD OFFICES							NEGOTIATION INSTRUCTIONS FOR HOTELS							NEGOTIATION INSTRUCTIONS FOR KEY CLIENTS (A)							NEGOTIATION INSTRUCTIONS FOR KEY CLIENTS (B)
	Choose one person in each meeting to keep short minutes, and send the minutes with the point calculation sheet to the instructor when all the meetings are over.							Choose one person in each meeting to keep short minutes, and send the minutes with the point calculation sheet to the instructor when all the meetings are over.							Choose one person in each meeting to keep short minutes, and send the minutes with the point calculation sheet to the instructor when all the meetings are over.							Choose one person in each meeting to keep short minutes, and send the minutes with the point calculation sheet to the instructor when all the meetings are over.
	You are expected to meet with all the properties in your chain (4).							You are expected to meet with your head office (1), and all the key clients (4).							You are expected to meet with as many hotels (up to all 8) as you like.							You are expected to meet with as many hotels (up to all 8) as you like.
	The goals for each meeting type follow. Your counterpart has the same negotiation points.							The goals for each meeting type follow. Your counterpart has the same negotiation points.							The goals for each meeting type follow. Your counterpart has the same negotiation points.							The goals for each meeting type follow. Your counterpart has the same negotiation points.
	After the negotiation session is over, count the number of points you received using the excel sheet and report total points as part of your reflection. The points themselves do not define your grade. Instead, they are designed to help you reflect on your negotiation success. If the instructions appear unclear, contact the teacher for advice!							After the negotiation session is over, count the number of points you received using the excel sheet and report total points as part of your reflection. The points themselves do not define your grade. Instead, they are designed to help you reflect on your negotiation success. If the instructions appear unclear, contact the teacher for advice!							After the negotiation session is over, count the number of points you received using the excel sheet and report total points as part of your reflection. The points themselves do not define your grade. Instead, they are designed to help you reflect on your negotiation success. If the instructions appear unclear, contact the teacher for advice!							After the negotiation session is over, count the number of points you received using the excel sheet and report total points as part of your reflection. The points themselves do not define your grade. Instead, they are designed to help you reflect on your negotiation success. If the instructions appear unclear, contact the teacher for advice!
	Below you will find the goals you must pursue during your negotiations. For each outcome, you receive the amount of points stated in the tables. Your negotiation partner does not know these amounts, and it is in your interest to keep them confidential. You have ample time to conduct negotiations; you do not need to rush into decisions, there is time for several meetings with a counterpart if you …							Below you will find the goals you must pursue during your negotiations. For each outcome, you receive the amount of points stated in the tables. Your negotiation partner does not know these amounts, and it is in your interest to keep them confidential. You have ample time to conduct negotiations; you do not need to rush into decisions, there is time for several meetings with a counterpart if you …							Below you will find the goals you must pursue during your negotiations. For each outcome, you receive the amount of points stated in the tables. Your negotiation partner does not know these amounts, and it is in your interest to keep them confidential. You have ample time to conduct negotiations; you do not need to rush into decisions, there is time for several meetings with a counterpart if you …							Below you will find the goals you must pursue during your negotiations. For each outcome, you receive the amount of points stated in the tables. Your negotiation partner does not know these amounts, and it is in your interest to keep them confidential. You have ample time to conduct negotiations; you do not need to rush into decisions, there is time for several meetings with a counterpart if you …
	Meetings with hotels							Meetings with head office							Meetings with hotels							Meetings with hotels
	You must meet with all the four properties in your chain with three goals (G1-G3):							In the meeting with your head office you have three goals (G1-G3):							Choose properties from each chain and propose meetings with them. The properties may accept or decline your request; in the latter case you must propose new meetings until you manage to meet with at least three properties from each chain. The organization of the meetings is up to you.							Choose properties from each chain and propose meetings with them. The properties may accept or decline your request; in the latter case you must propose new meetings until you manage to meet with at least three properties from each chain. The organization of the meetings is up to you.
	Your first task is to negotiate investments in the property or its services s to allow more customer value to be created by the property. The amount of investment has been capped at €100,000 (maximum amount). Key points to agree on are (G1) what the money is spent on, and (G2) how the cost is divided between the head office and the property. Propose investments that you identified as important to…							Your first task is to negotiate investments in the property or its services to allow more customer value to be created by the property. The amount of investment has been capped at €100,000 (maximum amount). Key points to agree on are (G1) what the money is spent on, and (G2) how the cost is divided between the hotel and the head office. Propose investments that you identified as important to crea…
															Assume that you already have an earlier contract with the hotel. Your negotiation should focus on number of rooms you buy and the % change of prices compared to the earlier contract. You do not need to discuss absolute prices.							Assume that you already have an earlier contract with the hotel. Your negotiation should focus on number of rooms you buy and the % change of prices compared to the earlier contract. You do not need to discuss absolute prices.
															You need a total 800 room nights for the year. You must negotiate on two goals: G1) room rate changes and G2) room volumes. When agreeing on these, consider the value the property can bring to you (the services and facilities it offers) and the arguments of the hotel.							You need a total 800 room nights for the year. You must negotiate on two goals: G1) room rate changes and G2) room volumes. When agreeing on these, consider the value the property can bring to you (the services and facilities it offers) and the arguments of the hotel.
G1	Agreed investments (up to 100kEUR)				Points you receive		G1	Agreed investments (up to 100kEUR)				Points you receive
	- improvements that you identified				3	per 1000 EUR invested		- improvements that you identified				3	per 1000 EUR invested	G1	Rate change vs current level				Points you receive		G1	Rate change vs current level				Points you receive
	- improvements you did not identify				1	per 1000 EUR invested		- improvements you did not identify				1	per 1000 EUR invested		-0.1				350			-0.1				200
															-0.05				150			-0.05				100
	For example, if you agreed to spend 60 kEUR on investments you identified, and 10 kEUR							For example, if you agreed to spend 60 kEUR on investments you identified, and 10 kEUR							+5%				-250			+5%				50
	on investments the hotel identified, you would receive 3x60 + 1x10 = 190 points.							on investments the head office identified, you would receive 3x60 + 1x10 = 190 points.
G2	Split of investment cost				Points you receive		G2	Split of investment cost				Points you receive		G2	Room volume				Points you receive		G2	Room volume				Points you receive
	40% head-office/ 60% property				200			40% property/ 60% head-office				250			250				250			250				400
	60% head-office/ 40% property				0			60% property/ 40% head-office				50			150				200			150				250
															50				150			50				50
	No agreement would lead to a penalty of:				-500	points		No agreement would lead to a penalty of:				-500	points		(note: zero rooms booked results in 0 points on both accounts)							(note: zero rooms booked results in 0 points on both accounts)
	In case negotiation results do not equal the given values, round them according to normal rounding rules. Negotiating a better outcome than indicated above does not lead to additional points.							In case negotiation results do not equal the given values, round them according to normal rounding rules. Negotiating a better outcome than indicated above does not lead to additional points.							In case negotiation results do not equal the given values, round them according to normal rounding rules. Negotiating better rates or higher volumes than indicated above does not lead to additional points.							In case negotiation results do not equal the given values, round them according to normal rounding rules. Negotiating better rates or higher volumes than indicated above does not lead to additional points.
	Your second task is to negotiate (G3) value-based rate structure adjustments on the basis of the price-value matrices for each of the four properties vs their current benchmark rate. This amounts to your group pricing strategy for optimizing the revenue for all four properties as a whole.							Your second task is to negotiate (G3) average rate structure adjustments on the basis of value that you propose through the investments. These average changes should be then reflected in your meetings with the key clients.							DURING THE NEGOTIATION PREPARATION SESSION, BEFORE THE ACTUAL NEGOTIATIONS START:							DURING THE NEGOTIATION PREPARATION SESSION, BEFORE THE ACTUAL NEGOTIATIONS START:
	A key point that you will need to agree is how much the current benchmark rates of the hotel in question are adjusted towards those that you have analyzed in your price-value matrices. Your possible outcomes and their values to you are the following:							A key point that you will need to agree is how much the current benchmark rates will be adjusted. Your possible outcomes and their value to you are the following:							The head offices of each chain will contact you to discuss what kind of investments in their hotels would increase value that you perceive in their hotels. Give your insights to the head offices based on your strategic preparation.							The head offices of each chain will contact you to discuss what kind of investments in their hotels would increase value that you perceive in their hotels. Give your insights to the head offices based on your strategic preparation.
G3	Average rate adjustments vs. current rates				Points you receive		G3	Average rate adjustments vs. current rates				Points you receive			The head offices will initiate these meetings. Add this information to your presentation.							The head offices will initiate these meetings. Add this information to your presentation.
	+5%				400			+5%				-200
	0				50			0				50
	-0.05				-200			-0.05				250
	No agreement would lead to a penalty of:				-500	points		No agreement would lead to a penalty of:				-500	points
	In case negotiation results do not equal the given values, round them according to normal rounding rules. Negotiating a better outcome than indicated above does not lead to additional points.							In case negotiation results do not equal the given values, round them according to normal rounding rules. Negotiating a better outcome than indicated above does not lead to additional points.
	DURING THE NEGOTIATION PREPARATION SESSION, BEFORE THE ACTUAL NEGOTIATIONS
	START:
	Meet with some or all of the key clients to discuss what kind of investments in your
	properties would improve value for the key clients and make them willing to
	patronize or pay more for those properties.
	It is your task to propose such meetings, as such information directly from the client
	is very valuable to you. You will be able to use this when negotiating investments with
	the hotels. Add this information also to your presentation.
								Meetings with key clients (C)
								In addition to meeting with your head office, you must meet with the four key clients to try to secure room contracts for the year. Propose meetings with all four key clients. They may or may not accept to see you, but continue until you have most meetings agreed.
								Assume that you already had a contract with the key client earlier. Therefore, you do not need to discuss absolute room rates, but rate changes compared to previous contract. Your negotiation should focus on G1) the % change of rates compared to the earlier contract and G2) the number of rooms you sell.
								You will receive points according to the following tables:
							G1	Rate change vs current level				Points you receive
								-0.1				-150
								-0.05				50
								+5%				200
							G2	Room volume				Points you receive
								250				350
								150				250
								50				50
								(note: zero rooms booked results in 0 points on both accounts)
								During your negotiations, keep in mind the investments in facilities or services that are aimed at creating value for the customers and use these to argue for your rates.
								In case negotiation results do not equal the given values, round them according to normal rounding rules. Negotiating better rates or higher volumes than indicated above does not lead to additional points.
								Meetings with key clients (D)
								In addition to meeting with your head office, you must meet with the four key client to try to secure room contracts for the year. Propose meetings with all four key clients. They may or may not accept to see you, but continue until you have most meetings agreed.
								Assume that you already had a contract with the key client earlier. Therefore, you do not need to discuss absolute room rates, but rate changes compared to previous contract. Your negotiation should focus on G1) the % change of rates compared to the earlier contract and G2) the number of rooms you sell.
								You will receive points according to the following tables:
							G1	Rate change vs current level				Points you receive
								-0.1				-200
								-0.05				100
								+5%				350
							G2	Room volume				Points you receive
								250				250
								150				150
								50				100
								(note: zero rooms booked results in 0 points on both accounts)
								During your negotiations, keep in mind the investments in facilities or services that are aimed at creating value for the customers and use these to argue for your rates.
								In case negotiation results do not equal the given values, round them according to normal rounding rules. Negotiating better rates or higher volumes than indicated above does not lead to additional points.

## Sheet: 8) Reflection and presentation
Reflection guideline
The purpose of reflection is to learn to perform better in future similar situations.
When reflecting on your negotiations, please consider the following questions:
(adapted from the Gibbs reflection model, Gibbs, 2013)
1. Description: What happened during the negotiations?
2. Feeling: What were you thinking and feeling during the negotiations? Did you live in the moment
or think about the strategy defined earlier?
3. Evaluation: What went well during the play for your group? What went poorly?
Were you able to consider value when discussing investments and/or rates?
4. Analysis: Did you manage to work according to your strategy? Did the hotel investments appear
interesting (value providing) to the key clients?
5. Conclusion: Are there alternative ways you could have acted in? As a team, or as an individual.
6. Action: If you faced the same situation now, knowing what you just experienced,
what would you do differently?
Final presentation outline
The presentation should have two main components:
1) the strategy and negotiation tactic developed before the interactive part.
2) reflection, using the above reflection model. The reflection should start by presenting
the teams' points summary. Points earned are not a grading criteria; they forms a basis for reflection.
Please see the PPT for more detail.
Consider also the following question:
Hotels: How did you choose investments you proposed to your head office?
Key clients: Did you find the hotel investments to bring value to you? Give a short example
of why/ why not.
Head offices: Did you discuss investments/ value with the key clients before the negotiations?
Were you able to convince the hotels of your views on the investments?
References:
Gibbs G (2013) Learning by Doing. Oxford Brookes University: Oxford.

## Sheet: 9) Grading criteria
Pre-assignment
Pass/Fail
Best 10 reports - 0.5 point bonus:
	Thoroughness of data collection
	Focus on the right market
	Use of data given
Presentation
Strategy presentation
	Identification of value from the expected perspective
	Relevance of market analysis
	Flow and quality of presentation
Reflection on negotiations
	Evaluation of negotiation success vs goals (successes, failures)
	Identification of reasons for the above
	"What would I have done differently"?
Reflection in groups according to role (if time)
No grade
Compare your negotiation experiences with those of your counterparts in other groups;
	What kind of similarities and differences can you spot?
	Are there clear patterns in these?
	What do you think caused the differences?
