# Supplementary material for: Game—Gimme a Better Price! A Negotiation Role Play on B2B Pricing in Hotel Revenue Management
Source: Atypon-hosted journal article supplement (doi:10.1287/ited.2021.0268), 2022-02-02
Supplement: ited.2021.0268.sm2.xlsx [file ited.2021.0268.sm2.xlsx]

## Sheet: Head office (HO)
USE DROP DOWN MENUS ACCESSIBLE BY CLICKING ON THE ORANGE CELLS TO FILL THE TEMPLATE. INPUT INVESTMENT AMOUNTS MANUALLY.
		1	5			2	6			3	7			4	8
Property		Louvre Hotels Group (Head Office)
		Negotiation partner
		Property 5				Property 6				Property 7				Property 8
Negotiation topic		Premiere Classe Lyon Centre Gare Part Dieu				Kyriad Lyon Bron Eurexpo Le Cottage				Campanile Lyon Centre Gare Part Dieu				Golden Tulip Lyon Millenaire
Investments in:			Amount	Points/ kEUR	Total points		Amount	Points/ kEUR	Total points		Amount	Points/ kEUR	Total points		Amount	Points/ kEUR	Total points
	Improvements identified by property	EUR	0	1	0	EUR	20000	1	20	EUR	0	1	0	EUR	10000	1	10
	Improvements identified by head office	EUR	100000	3	300	EUR	80000	3	240	EUR	100000	3	300	EUR	90000	3	270
Investment paid by:
	Select one alternative:	40% HO/60% property			200	40% HO/60% property			200	40% HO/60% property			200	40% HO/60% property			200
Rate structure
	ADR change for next Q1	+5%			400	0			50	+5%			400	No deal			-500
Total points per partner					900				510				900				-20
Grand total					2290

## Sheet: Property
USE DROP DOWN MENUS ACCESSIBLE BY CLICKING ON THE ORANGE CELLS TO FILL THE TEMPLATE. IF "NO DEAL", BOTH PRICE CHANGE AND VOLUME MUST BE SET AT THIS ALTERNATIVE (OR AN ERROR IS DISPLAYED).
Property		Premiere Classe Lyon Centre Gare Part Dieu				2
		Negotiation partner
		Head Office				Key Client 1		Key Client 2		Key Client 3		Key Client 4
Negotiation topic		0				EuroNews	Points	Renault Trucks	Points	Biomerieux	Points	Sanofi-Pasteur	Points
Investments in:			Amount	Points/ kEUR	Total points
	Improvements identified by property	EUR	100000	3	300
	Improvements identified by head office	EUR	0	1	0
Investment paid by:
	Select one alternative:	60% property/40% HO			50
Rate structure
	ADR change for next Q1	0			50
Relative price change vs Q1 this year						No deal	0	-0.05	50	+5%	200	No deal	0
(No deal = no deal or no negotiations with the key client)						0		-0.05		0.05		0
Volume for Q1 next year						No deal	0	250	350	150	250	No deal	0
						0		250		150		0
Total points per partner					400		0		400		450		0
Grand total					1250
Rooms sold					400
Average rate change					-0.0125

## Sheet: Key client (KC)
USE DROP DOWN MENUS ACCESSIBLE BY CLICKING ON THE ORANGE CELLS TO FILL THE TEMPLATE. IF "NO DEAL", BOTH PRICE CHANGE AND VOLUME MUST BE SET AT THIS ALTERNATIVE (OR AN ERROR IS DISPLAYED).
Key Client		Renault Trucks		4
		Property (If you did not negotiate with a hotel, indicate "no deal")
		Property 1		Property 2		Property 3		Property 4
Negotiation topic		ibis budget Lyon La Part Dieu	Points	Ibis Lyon Centre Perrache	Points	Ibis Styles Lyon Bron Eurexpo	Points	Mercure Lyon Centre Chateau Perrache	Points
Relative price change vs Q1 this year		+5%	-250	No deal	0	-0.05	150	No deal	0
(No deal = no deal or no negotiations with the property)		0.05		0		-0.05		0
Volume for Q1 next year		250	250	No deal	0	150	200	No deal	0
		250		0		150		0
Total points per partner			0		0		350		0
		Property 5		Property 6		Property 7		Property 8
Negotiation topic		Premiere Classe Lyon Centre Gare Part Dieu	Points	Kyriad Lyon Bron Eurexpo Le Cottage	Points	Campanile Lyon Centre Gare Part Dieu	Points	Golden Tulip Lyon Millenaire	Points
Relative price change vs Q1 this year		No deal	0	-0.05	150	+5%	-250	No deal	0
(No deal = no deal or no negotiations with the property)		0		-0.05		0.05		0
Volume for Q1 next year		No deal	0	50	150	150	200	No deal	0
		0		50		150		0
Total points per partner			0		300		-50		0
Grand total		600
Rooms bought		600	0
Number of hotels		4
Average price change		0.0166667

## Sheet: data
Property-HO negotiations
Investments
property			head-office				property	HO
40% property/60% HO	250		40% HO/60% property	200		Improvements identified by property	3	1
60% property/40% HO	50		60% HO/40% property	0		Improvements identified by head office	1	3
No deal	-500		No deal	-500
Average rate change
	property	HO
+5%	-200	400
0	50	50
-0.05	250	-200
No deal	-500	-500
Property-KC negotiations
rates	Property C	Property D	KC A	KC B
-0.1	-150	-200	350	200
-0.05	50	100	150	100
+5%	200	350	-250	50
No deal	0	0	0	0
volume (rooms)
250	350	250	250	400
150	250	150	200	250
50	50	100	150	50
No deal	0	0	0	0
Players
Chain 1	Accor Hotels (Head Office)
Chain 2	Louvre Hotels Group (Head Office)
Key client 1	EuroNews
Key client 2	Renault Trucks
Key client 3	Biomerieux
Key client 4	Sanofi-Pasteur
Property 1	ibis budget Lyon La Part Dieu
Property 2	Ibis Lyon Centre Perrache
Property 3	Ibis Styles Lyon Bron Eurexpo
Property 4	Mercure Lyon Centre Chateau Perrache
Property 5	Premiere Classe Lyon Centre Gare Part Dieu
Property 6	Kyriad Lyon Bron Eurexpo Le Cottage
Property 7	Campanile Lyon Centre Gare Part Dieu
Property 8	Golden Tulip Lyon Millenaire
